# Supplementary material for: First Isolation and Identification of Neopestalotiopsis clavispora Causing Postharvest Rot of Rosa sterilis and Its Control with Methyl Jasmonate and Calcium Chloride
Source: MDPI journal article supplement (doi:10.3390/horticulturae8030190), 2022-02-22
Supplement: s1 [file s1]

## Supplementary Data

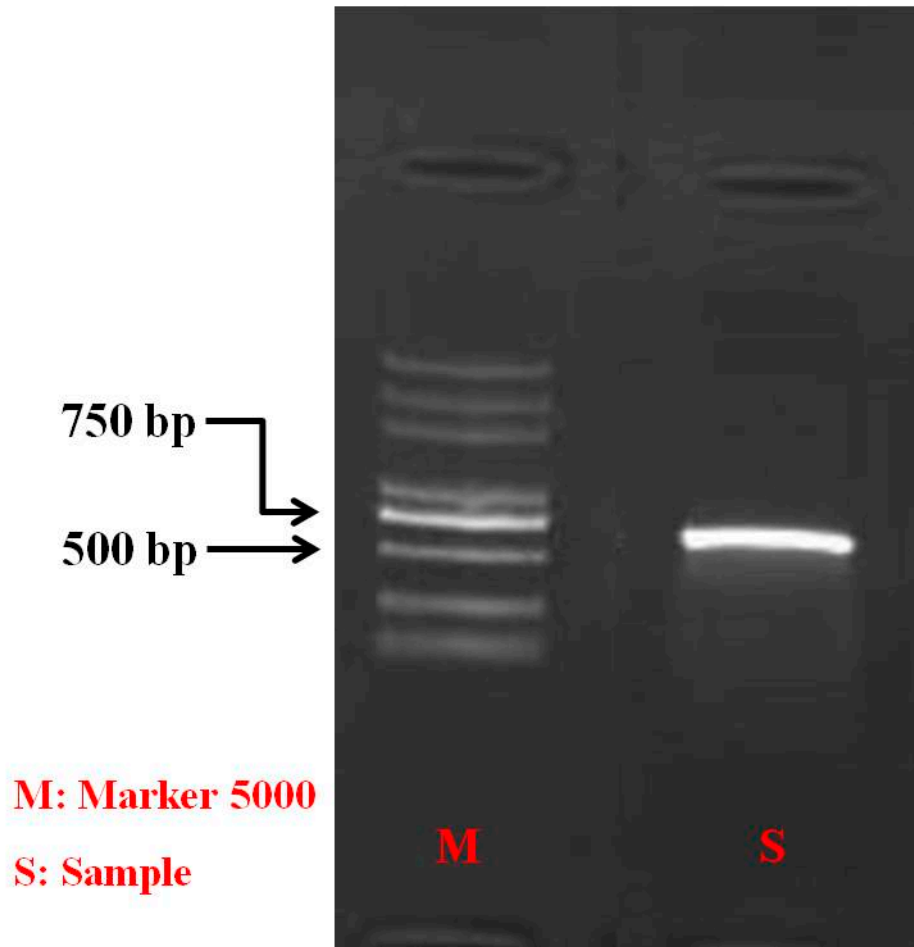

**Figure S1** Gel electrophoresis of pathogen PCR-amplification results

**Doc. S1** The full-length rDNA-ITS sequence of the strain to be tested is as follows:

```
atatgcttaagtcagcgggtattcctacatgatccgaggtcaaccacaaaaaattgggggttagcggctgggagttatagcacctaac
aaaagcgagaaaaaattactacgctcagaggatactacaaatccgccgttgatttcaggaactacaactcctaagagaagtagattcc
caacactaagctaggcttaagggtgaaatgacgctcgaacaggcatgccactagaataactaatgggcgcaatgtgcgttcaaagatt
cgatgattcactgaattctgcaattcacattactatcgcatttcgctgcgttcttcacgatgccagaaccaagagatccgttggtgaaagtt
ttgacttattaaaataagacgctcagattacataaaaataacaagagttaatggtccaccggcagcagctataagaagacctataacttctg
ccgaggcaacaaaaggtaagttcacatgggttgggagtttagaaaactctataatgatccctccgctggttcaccaacggagaccttggt
acgacttttacttct
```
